# Supplementary material
Source: PubMed Central journal article supplement (PMC6366533)
Supplement: en.2017-03150.sf1.pdf [file en.2017-03150.sf1.pdf]

SUPPLEMENTARY MATERIALS

Supplemental Figure 1.

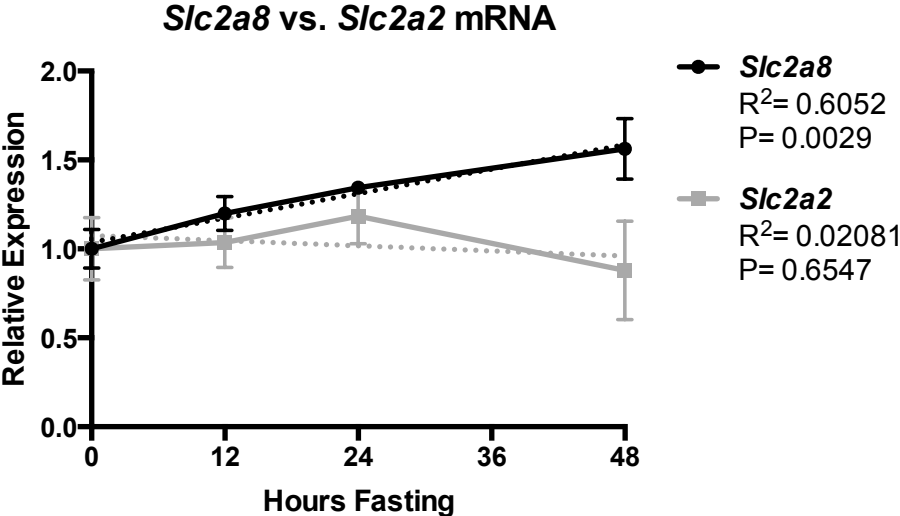

**Supplemental Figure 1. Linear upregulation of hepatic GLUT8 mRNA during fasting.** qRT-PCR analysis of hepatic *Slc2a8* (GLUT8) and *Slc2a2* (GLUT2) mRNA transcript levels in WT mice over the course of 48 hours of fasting. Linear regression calculated for each mRNA, with R<sup>2</sup> and p-value indicated. n = 3 mice/group. (Data are presented as mean ± SEM).

Supplemental Figure 2.

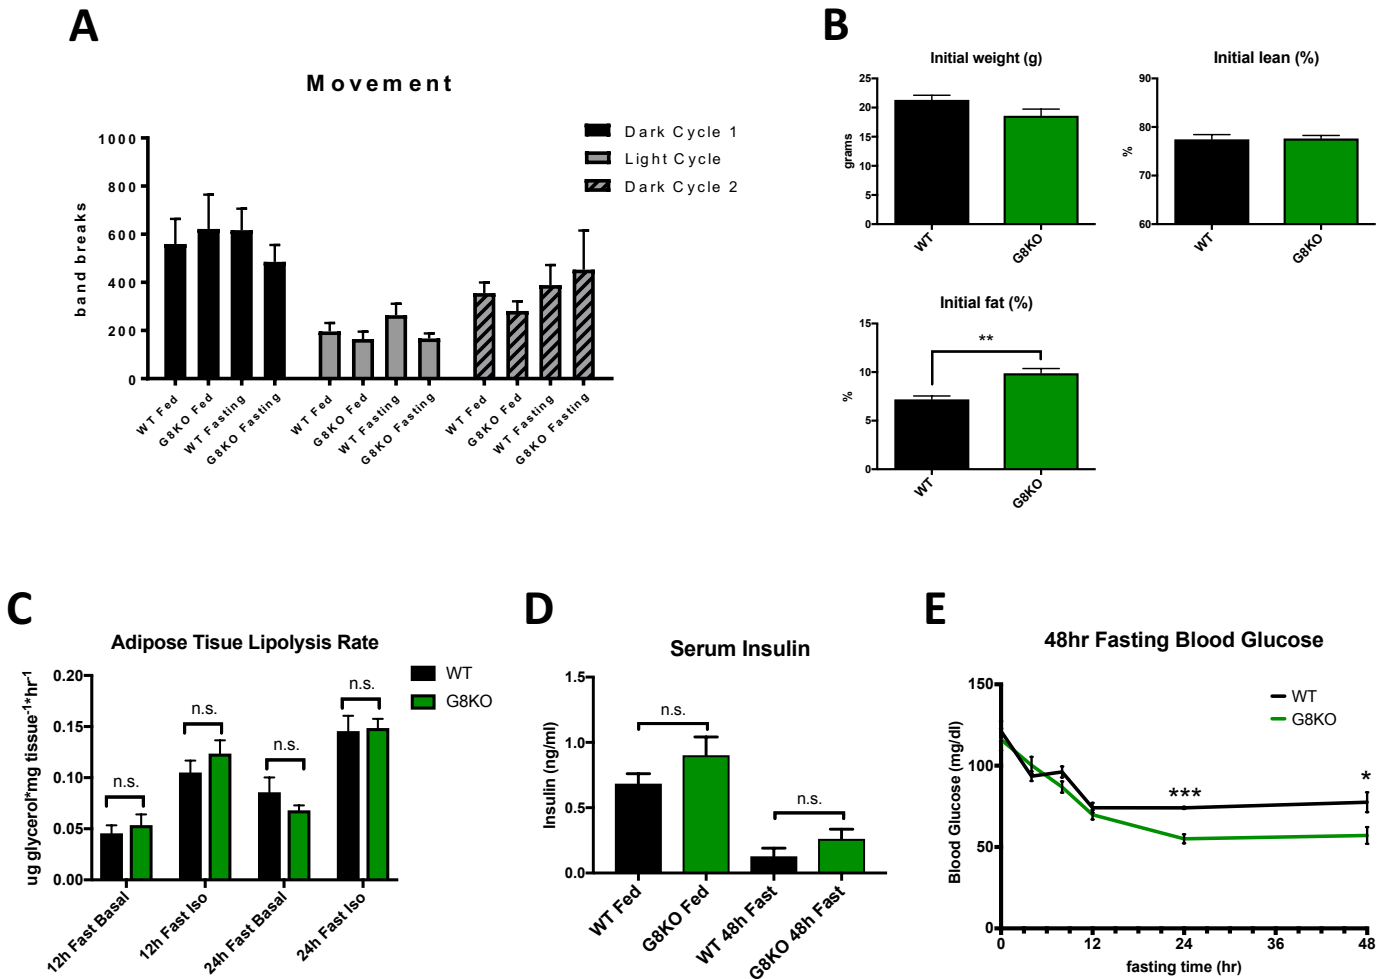

Supplemental Figure 2.

(A) Movement measurements in WT and G8KO mice over a 48 hour period of ad lib chow feeding or fasting.  $n = 4$  (WT fed),  $4$  (G8KO fasted),  $6$  (WT fasted),  $5$  (G8KO fasted). (B) EchoMRI quantification of initial weight, initial percent lean mass, and initial percent body fat in WT and G8KO mice prior to fasting.  $n = 6$  (WT),  $5$  (G8KO). (C) Lipolysis rate in white adipose explant tissue from 12 or 24 hour fasted WT or G8KO mice, as assessed by glycerol release in the presence or absence of isoproterenol (Iso).  $n = 6$  (12h fast WT basal),  $8$  (12h fast G8KO basal),  $10$  (12h fast WT iso),  $12$  (12h fast G8KO iso),  $6$  (24h fast WT basal),  $4$  (24h fast G8KO basal),  $8$  (24h fast WT iso),  $10$  (24h fast G8KO iso). (D) ELISA quantification of serum insulin levels in WT and G8KO mice either chow-fed or fasted for 48h.  $n = 7$  (WT fed),  $8$  (G8KO fed),  $10$  (WT fast),  $9$  (G8KO fast). (E) Blood glucose measurements taken over a 48 hour fasting time period in WT and G8KO mice.  $n = 5$  (WT),  $6$  (G8KO). (Data are presented as mean  $\pm$  SEM; \* $p < 0.05$ , \*\* $p < 0.01$ , \*\*\* $p < 0.001$ ).

Supplemental Figure 3.

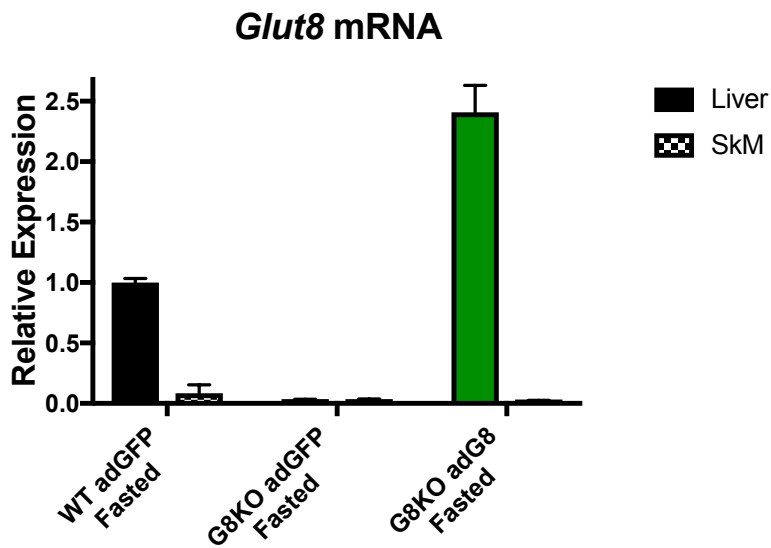

**Supplemental Figure 3.**

Quantification of *Glut8* mRNA transcript levels in liver and skeletal muscle tissue of WT or G8KO 48-hour fasted mice treated with adenoviral delivery of GFP (adGFP) or GLUT8 (ADG8). n= 2 (WT adGFP), 4 (G8KO adGFP), 4 (G8KO adG8) mice per group. (Data are presented as mean  $\pm$  SEM).

## Supplemental Figure 4.

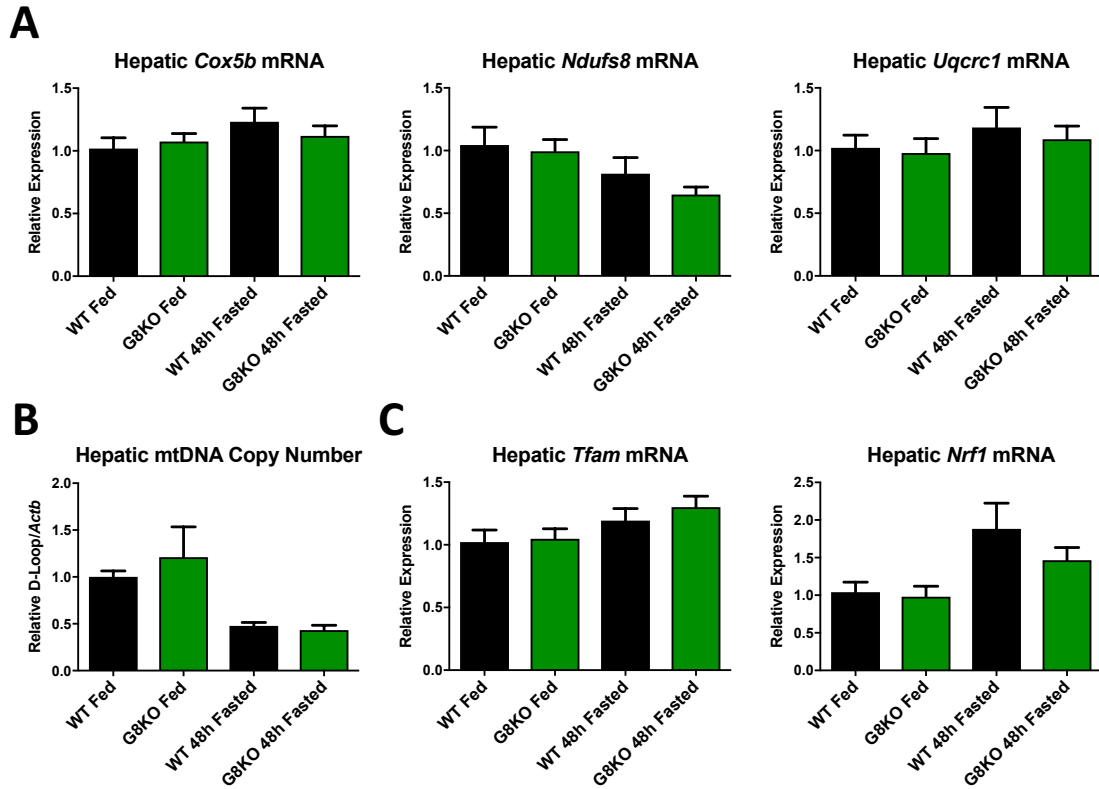

## Supplemental Figure 4.

**(A)** qRT-PCR analysis of mRNA encoding electron transport chain proteins COX5b, NDUFS8, and Uqcrc1 in livers from fed and 48h fasted WT and G8KO mice.  $n = 6$  mice/group. **(B)** qRT-PCR analysis of mtDNA copy number in liver from WT and G8KO fed or 48h fasted mice, quantified as the ratio of mitochondrial DNA (D-loop) to genomic DNA (ACTB).  $n = 3-5$  mice/group. **(C)** qRT-PCR analysis of mRNA encoding mitochondrial biogenesis transcription factors TFAM and NRF-1 in livers from fed and 48h fasted WT and G8KO mice.  $n = 6$  mice/group. (Data are presented as mean  $\pm$  SEM).

Supplemental Figure 5.

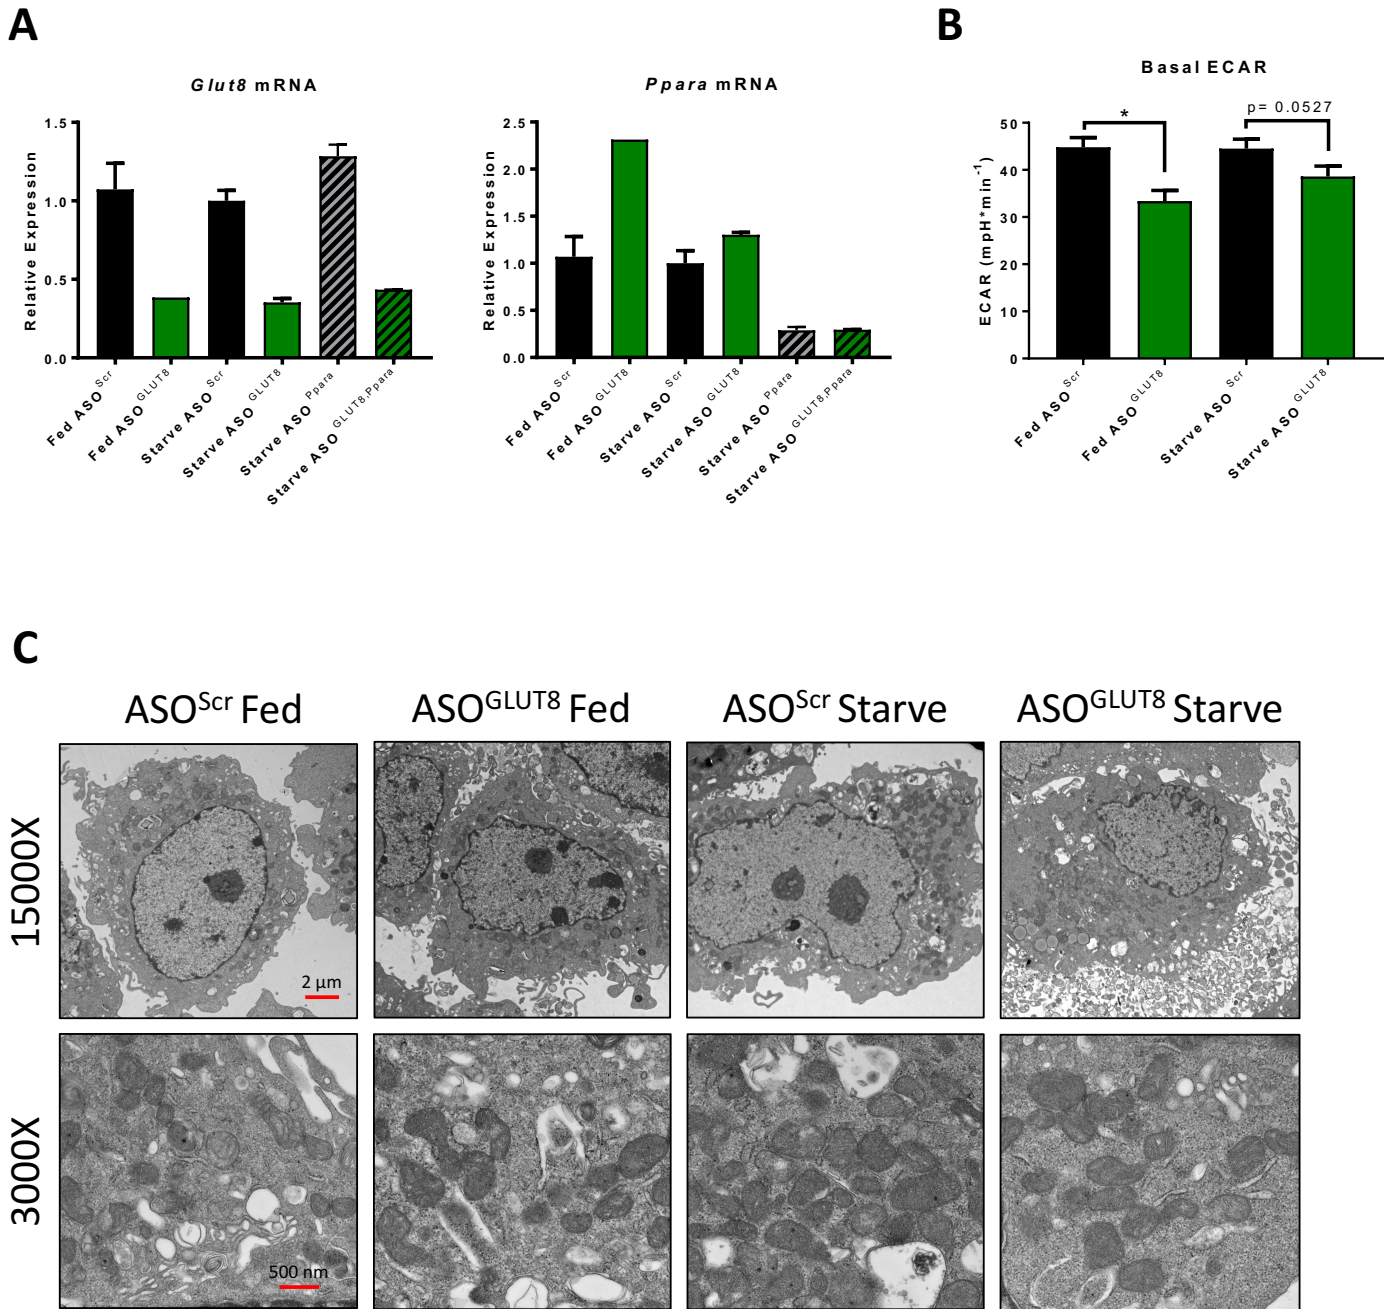

**Supplemental Figure 5.**

(A) Quantification of *Glut8* and *Ppara* mRNA transcript levels in fed or fasted AML12 hepatocytes treated ASO<sup>Scr</sup>, ASO<sup>GLUT8</sup>, or ASO<sup>Ppara</sup> and cultured in fed or starve media for 24 hours. (B) Basal extracellular acidification rate of AML12 hepatocytes treated with ASO<sup>Scr</sup> or ASO<sup>GLUT8</sup> and cultured in fed or starve media. (C) Electron micrographs of cells as in B. (Data are presented as mean ± SEM).

Supplemental Figure 6.

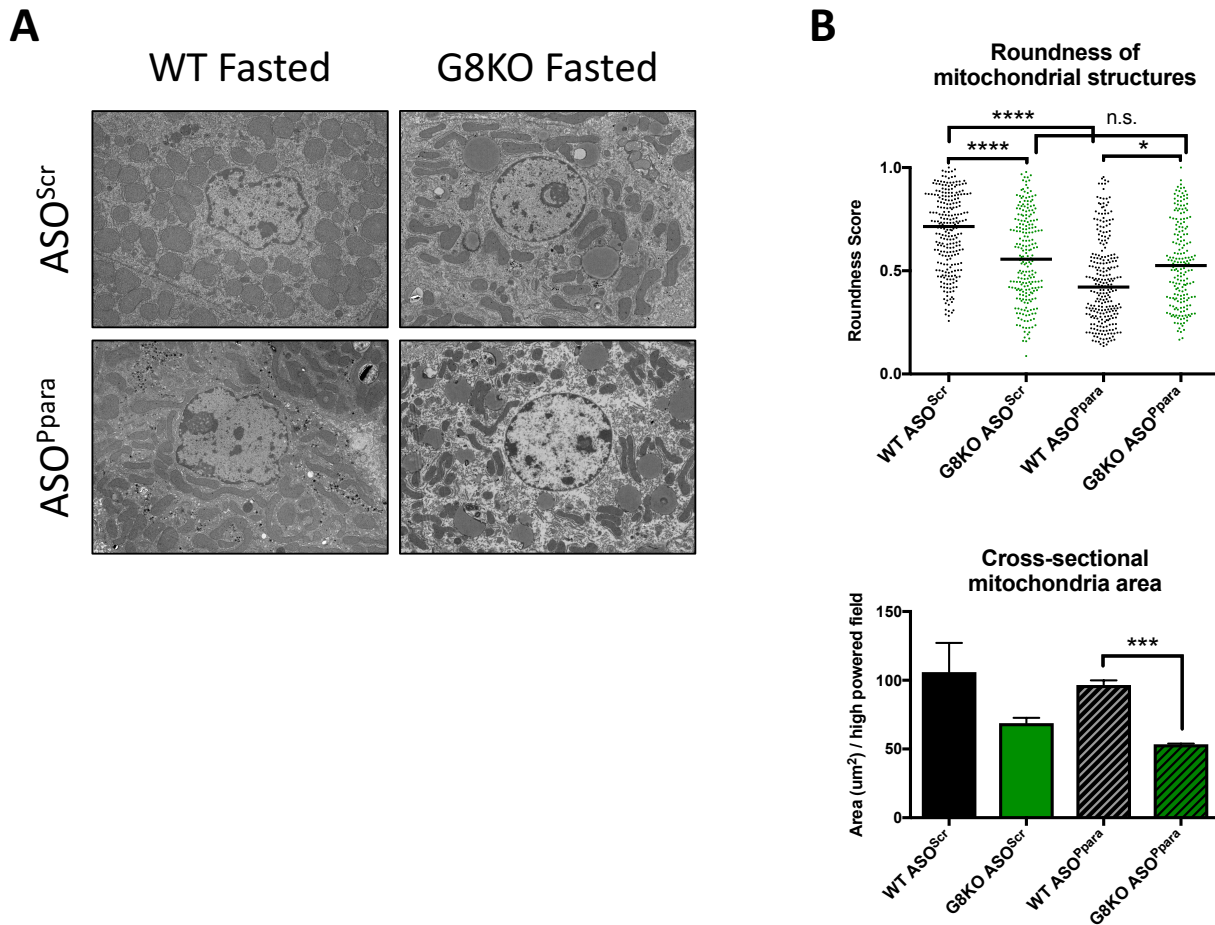

**Supplemental Figure 6. Mitochondrial morphology in livers with or without PPAR $\alpha$  knockdown.**

**(A)** Electron micrographs of representative liver sections from WT or G8KO 48h hour fasted mice after treatment with control (ASO<sup>Scr</sup>) or PPAR $\alpha$ -targeted (ASO<sup>Ppara</sup>) ASOs. **(B)** Quantification of mitochondrial cross-sectional area and roundness score of mitochondrial structures. n = 2-3 mice/group. Quantifications from 3 representative images per group. Komogorov-Smirnov test was used to analyze distribution of roundness scores. (Data are presented as mean  $\pm$  SEM; \*p<0.05, \*\*\*p<0.001, \*\*\*\*p<0.0001).
